# Supplementary material for: Low and contrasting impacts of vegetation CO 2 fertilization on terrestrial runoff over the past three decades: Accounting for above- and below-ground vegetation-CO 2 effects
Source: Copernicus journal article supplement (doi:10.5194/hess-2020-548), 2020-12-14
Supplement: Supplementary file 1 [file hess-2020-548-supplement.pdf]

## Supplementary Material

### **Low and contrasting impacts of vegetation CO<sub>2</sub> fertilization on terrestrial runoff over the past three decades: Accounting for above- and below-ground vegetation-CO<sub>2</sub> effects**

Yuting Yang<sup>1</sup>, Tim R. McVicar<sup>2,3</sup>, Dawen Yang<sup>1</sup>, Yongqiang Zhang<sup>4</sup>, Shilong Piao<sup>5</sup>, Shushi Peng<sup>5</sup>, Hylke E. Beck<sup>6</sup>

<sup>1</sup> State Key Laboratory of Hydrosience and Engineering, Department of Hydraulic Engineering, Tsinghua University, Beijing, China

<sup>2</sup> CSIRO Land and Water, Black Mountain, Canberra, ACT 2601, Australia

<sup>3</sup> Australian Research Council Centre of Excellence for Climate Extremes, The Australian National University, Canberra, Australia

<sup>4</sup> Key Laboratory of Water Cycle and Related Land Surface Processes, Institute of Geographic Sciences and Natural Resources Research, Chinese Academy of Sciences, Beijing, China

<sup>5</sup> Sino-French Institute for Earth System Science, College of Urban and Environmental Sciences, Peking University, Beijing 100871, China.

<sup>6</sup> Department of Civil and Environmental Engineering, Princeton University, Princeton, New Jersey, USA

## I. Relationship between Porporato's parameter $\omega$ and Chourhury's parameter $n$

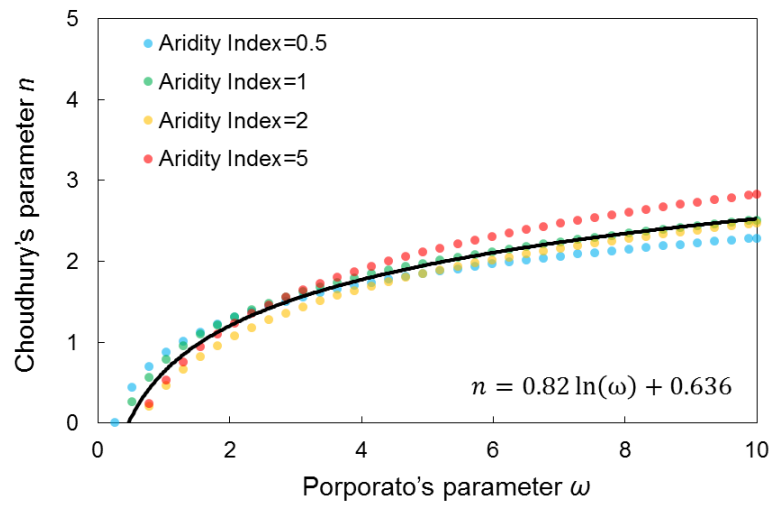

**Supplementary Figure S1** Relationship between Porporato's parameter  $\omega$  and Chourhury's parameter  $n$ . The black solid curve represents the best fit relationship ( $R^2=0.96$ ,  $p<0.001$ ) provided by the equation given on the figure.

## II. Global pattern of effective rooting depth

We estimated the effective rooting depth ( $Z_e$ ) using an analytical carbon cost-benefit model based on ecosystem optimality theory (4). The climatological mean  $Z_e$  during 1982-2010 is shown in Supplementary Figure S2.

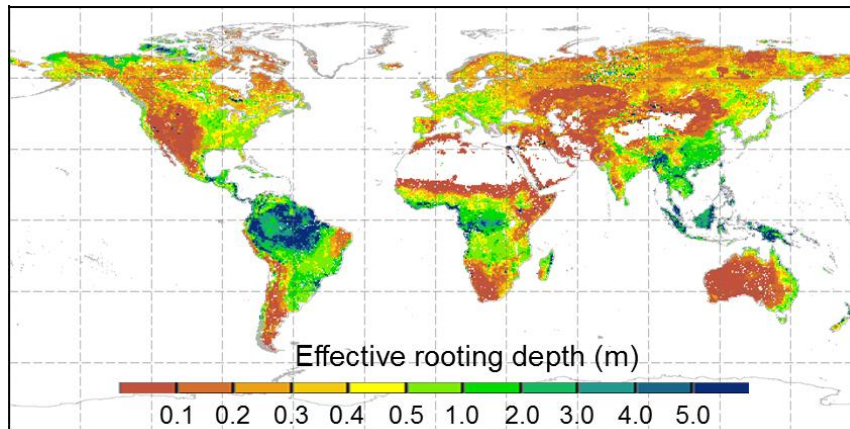

**Supplementary Figure S2** Global pattern of mean annual effective rooting depth over 1982-2010.

## V. Response of stomatal conductance to eCO<sub>2</sub>

The response of stomatal conductance ( $C_s$ ) to eCO<sub>2</sub> was determined using meta-analysis based on observations collected from 244 field experiments as summarized in *Ainsworth and Rogers (5)*. As the magnitude of eCO<sub>2</sub> varies in these 244 experiments, we obtained the sensitivity of  $C_s$  to eCO<sub>2</sub> (percentage change in  $C_s$  per 1% increase in  $C_a$ ) using linear interpolation. We then classified the 244 observations based on their biome type to construct a biome type-based look-up table of  $C_s$  sensitivity to eCO<sub>2</sub> (Supplementary Figure S3).

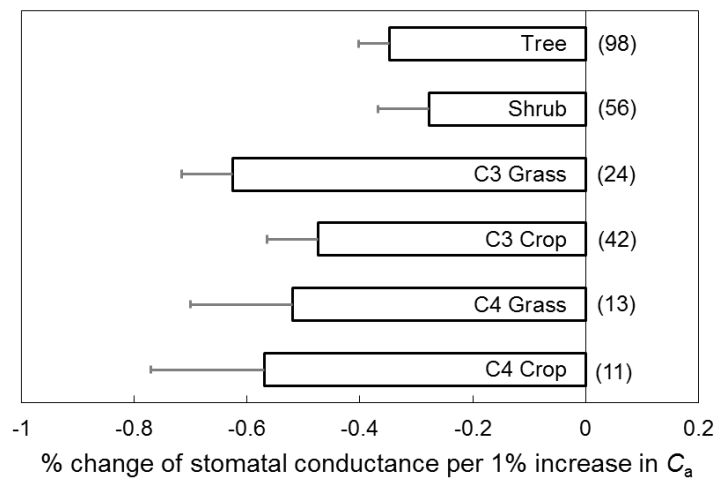

### Supplementary Figure S3 Sensitivity of leaf-level stomatal conductance to eCO<sub>2</sub>.

Numbers in the brackets indicate the number of observations in each biome type.

Error bars represent one standard deviation among individual observations.

### VIII. Sensitivity of $Q$ to $e\text{CO}_2$ , $P$ and $E_P$

In addition to showing the relative sensitivity of  $Q$  to  $e\text{CO}_2$ ,  $P$  and  $E_P$  in the main text (Figure 7), here we also show the absolute sensitivity of  $Q$  to  $e\text{CO}_2$ ,  $P$  and  $E_P$  (Supplementary Figure S4). Similar to the relative values, the absolute sensitivity of  $Q$  to  $e\text{CO}_2$  is higher in dry regions and lower in wet areas (Supplementary Figure S8a). Regarding the absolute sensitivity of  $Q$  to  $P$  and  $E_P$ , both show a higher value in wet regions and smaller value in dry areas (Supplementary Figure S4b and c).

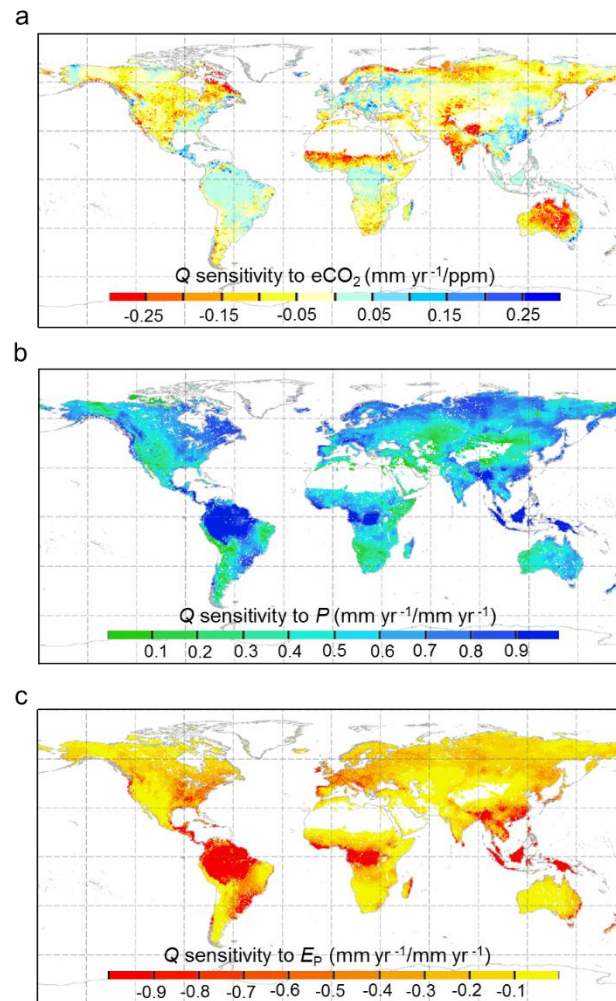

**Supplementary Figure S4** Spatial distribution of the absolute sensitivity of  $Q$  to (a)  $e\text{CO}_2$ , (b)  $P$  and (c)  $E_P$ .

## IX. Literature review of observed plant root characteristics in response to eCO<sub>2</sub>

In the current study, we modeled the response of effective rooting depth ( $Z_e$ ) to eCO<sub>2</sub> and found that  $Z_e$  increases with eCO<sub>2</sub> across the majority of global terrestrial ecosystems. However, it is impossible to directly validate our modeling result with field observations, as it is impossible to measure rooting depth across large regions. Here, we collected measured response of plant rooting characteristics (i.e., rooting depth and root biomass) to eCO<sub>2</sub> from 97 published observations (Supplementary Tables S1 and S2). Among these 97 observations, 86 (88.7%) reported an increased root length and/or root biomass as  $C_a$  rises. This is in consistent with our modeling results that eCO<sub>2</sub> generally increases the effective rooting depth (i.e., more roots, either in length or biomass). Since there is currently no large scale observations of rooting depth in response to eCO<sub>2</sub>, the Supplementary Tables S1 and S2 provide an indirect, yet best available observational support for our modeling results.

**Supplementary Table S1** Observed percentage changes (mean  $\pm$  1 standard deviation) in root characteristics ( $\Delta$  root) in response to eCO<sub>2</sub>. n is the number of observations and numbers in the brackets under column n indicates the number of observations showing increased root characteristics in response to eCO<sub>2</sub>.

| Root characteristics | Free-Air CO <sub>2</sub> Enrichment |                      |                   | Open Top Chamber / Glasshouse |                      |                   |
|----------------------|-------------------------------------|----------------------|-------------------|-------------------------------|----------------------|-------------------|
|                      | <i>N</i>                            | eCO <sub>2</sub> (%) | $\Delta$ root (%) | n                             | eCO <sub>2</sub> (%) | $\Delta$ root (%) |
| Total root Biomass   | 28 (26)                             | +52.6 $\pm$ 7.0      | +34.6 $\pm$ 32.7  | 36 (32)                       | +91.3 $\pm$ 18.3     | +38.0 $\pm$ 48.6  |
| Total root length    | 1 (1)                               | +76.5                | +38.8             | 3 (3)                         | +90.7 $\pm$ 6.9      | +33.3 $\pm$ 12.5  |
| Fine root biomass    | 24 (22)                             | +52.6 $\pm$ 8.6      | +52.6 $\pm$ 35.4  | 15 (14)                       | +80.0 $\pm$ 25.8     | +57.5 $\pm$ 52.1  |
| Fine root length     | 4 (3)                               | +44.0 $\pm$ 7.6      | +14.7 $\pm$ 11.3  | 3 (3)                         | +98.4 $\pm$ 1.5      | +96.8 $\pm$ 74.4  |

1 **Supplementary Table S2** Summary of observed root characteristics in response to elevation in atmospheric CO<sub>2</sub> concentration. *a*CO<sub>2</sub> in the  
2 ambient CO<sub>2</sub> concentration (ppm) and *e*CO<sub>2</sub> in the elevated CO<sub>2</sub> concentration (ppm). DRB is the dry root biomass; TRL is the total root length;  
3 DFRB is the dry fine root biomass; FRL is the fine root length. In the Method column, FACE represents Free-Air CO<sub>2</sub> Enrichment, OTC stands  
4 for open-top chamber and GH indicates glasshouse. Superscript 1 indicates root biomass in g m<sup>-2</sup>, superscript 2 indicates root biomass in g per  
5 experimental unit, superscript 3 indicates root biomass in g per plant, superscript 4 indicates root length in mm cm<sup>-2</sup>, superscript 5 indicates root  
6 length in m per plant. NR means not reported.

| No. | Species                                                           | Location |           | CO <sub>2</sub> concentration (ppm) |                          |             | DRB <sup>a</sup> or TRL <sup>b</sup> |                          |                | DFRB <sup>c</sup> or FRL <sup>d</sup> |                          |               | Method | Reference                |
|-----|-------------------------------------------------------------------|----------|-----------|-------------------------------------|--------------------------|-------------|--------------------------------------|--------------------------|----------------|---------------------------------------|--------------------------|---------------|--------|--------------------------|
|     |                                                                   | Latitude | Longitude | <i>a</i> CO <sub>2</sub>            | <i>e</i> CO <sub>2</sub> | Increase    | <i>a</i> CO <sub>2</sub>             | <i>e</i> CO <sub>2</sub> | Change         | <i>a</i> CO <sub>2</sub>              | <i>e</i> CO <sub>2</sub> | Change        |        |                          |
| 1   | <i>Pinus taeda L.</i>                                             | 35.97° N | 79.08° W  | 363                                 | 563                      | 200 (55%)   | NR                                   | NR                       | NR             | 238 <sup>c,1</sup>                    | 325                      | +87 (36.5%)   | FACE   | Allen et al. (8)         |
| 2   | <i>Calluna vulgaris,</i><br><i>Deschampsia</i><br><i>flexuosa</i> | 55.88° N | 8.68° E   | 380                                 | 510                      | 130 (34.2%) | NR                                   | NR                       | NR             | 47 <sup>c,1</sup>                     | 71                       | +24 (51%)     | FACE   | Andresen et al. (9)      |
| 3   | <i>Mixed forest</i>                                               | 47.47° N | 7.5° E    | 380                                 | 550                      | 170 (44.7%) | NR                                   | NR                       | NR             | 290 <sup>c,1</sup>                    | 256                      | -34 (-13.2%)  | FACE   | Bader et al. (10)        |
| 4   | <i>A. capillaris</i>                                              | 53.22° N | 4.13° W   | 340                                 | 680                      | 340 (100%)  | 0.05 <sup>a,3</sup>                  | 0.11                     | +0.06 (120%)   | NR                                    | NR                       | NR            | OTC    | Baxter et al. (11)       |
| 5   | <i>P. alpine</i>                                                  | 53.22° N | 4.13° W   | 340                                 | 680                      | 340 (100%)  | 0.45 <sup>a,3</sup>                  | 0.55                     | +0.10 (22.2%)  | NR                                    | NR                       | NR            | OTC    | Baxter et al. (11)       |
| 6   | <i>F. vivipara</i>                                                | 53.22° N | 4.13° W   | 340                                 | 680                      | 340 (100%)  | 5.2 <sup>a,3</sup>                   | 2.80                     | -2.4 (-46.1%)  | NR                                    | NR                       | NR            | OTC    | Baxter et al. (11)       |
| 7   | <i>Lolium perenne</i>                                             | 47.45° N | 8.68° E   | 350                                 | 600                      | 250 (71.4%) | 1.125 <sup>a,3</sup>                 | 1.25                     | +0.125 (11.1%) | NR                                    | NR                       | NR            | FACE   | Bazot et al. (12)        |
| 8   | <i>Sweet potato</i>                                               | 35.78° N | 78.68° W  | 364                                 | 666                      | 302 (83%)   | 59.28 <sup>a,3</sup>                 | 83.18                    | +23.9 (40.3%)  | NR                                    | NR                       | NR            | OTC    | Bhattacharya et al. (13) |
| 9   | <i>Scrub-Oak</i>                                                  | 28.63° N | 80.7° W   | 363                                 | 726                      | 363 (100%)  | 737 <sup>a,1</sup>                   | 498                      | -239 (32.4%)   | NR                                    | NR                       | NR            | OTC    | Brown et al. (14)        |
| 10  | <i>P. alba</i>                                                    | 42.37° N | 11.8° E   | 370                                 | 550                      | 180 (48.6%) | 758 <sup>a,1</sup>                   | 1046                     | +288 (38%)     | 265 <sup>c,1</sup>                    | 478                      | +2.13 (80.4%) | FACE   | Calfapietra et al. (15)  |
| 11  | <i>P. nigra</i>                                                   | 42.37° N | 11.8° E   | 370                                 | 550                      | 180 (48.6%) | 844 <sup>a,1</sup>                   | 1030                     | +186 (22%)     | 273 <sup>c,1</sup>                    | 387                      | +1.14 (41.8%) | FACE   | Calfapietra et al. (15)  |

|    |                                 |          |           |     |     |             |                      |       |                     |                      |       |                       |      |                         |
|----|---------------------------------|----------|-----------|-----|-----|-------------|----------------------|-------|---------------------|----------------------|-------|-----------------------|------|-------------------------|
| 12 | <i>P. × euramericana</i>        | 42.37° N | 11.8° E   | 370 | 550 | 180 (48.6%) | 787 <sup>a,1</sup>   | 1011  | +224 (28.5%)        | 295 <sup>c,1</sup>   | 446   | +1.51 (51.2%)         | FACE | Calfapietra et al. (15) |
| 13 | <i>Mixed grasses</i>            | 41.18° N | 104.9° W  | 383 | 600 | 217 (56.7%) | NR                   | NR    | NR                  | 303.4 <sup>c,1</sup> | 319   | +15.6 (5.1%)          | FACE | Carrillo et al. (16)    |
| 14 | <i>Prunus persica</i>           | 55.87° N | 3.2° W    | 350 | 700 | 350 (100%)  | 15.8 <sup>a,3</sup>  | 19.8  | +4 (25.3%)          | NR                   | NR    | NR                    | OTC  | Centritto et al. (17)   |
| 15 | <i>Scots Pine</i>               | 51.12° N | 0.83° W   | 350 | 700 | 350 (100%)  | NR                   | NR    | +50% <sup>a,3</sup> | NR                   | NR    | NR                    | OTC  | Crookshanks et al. (18) |
| 16 | <i>Ash</i>                      | 51.12° N | 0.83° W   | 350 | 700 | 350 (100%)  | 131.3 <sup>a,3</sup> | 133.3 | +2.0 (1.5%)         | 30.75 <sup>c,3</sup> | 39.25 | +8.5 (27.6%)          | OTC  | Crookshanks et al. (18) |
| 17 | <i>Oak</i>                      | 51.12° N | 0.83° W   | 350 | 700 | 350 (100%)  | 106.9 <sup>a,3</sup> | 133.7 | +26.8 (25.1%)       | 8.75 <sup>c,3</sup>  | 20.12 | +11.37 (130%)         | OTC  | Crookshanks et al. (18) |
| 18 | <i>Mixed grasses</i>            | 45.4° N  | 93.18° W  | 378 | 560 | 182 (48.1%) | 580 <sup>a,1</sup>   | 715   | +135 (23.3%)        | 410 <sup>c,1</sup>   | 520   | +110 (26.8%)          | FACE | Crous et al. (19)       |
| 19 | <i>Mixed forbs</i>              | 45.4° N  | 93.18° W  | 378 | 560 | 182 (48.1%) | 145 <sup>a,1</sup>   | 170   | +25 (17.2%)         | 80 <sup>c,1</sup>    | 125   | +45 (56.3%)           | FACE | Crous et al. (19)       |
| 20 | <i>Oak-palmetto</i>             | 28.63° N | 80.7° W   | 350 | 700 | 350 (100%)  | NR                   | NR    | NR                  | NR                   | NR    | +63.2% <sup>d,4</sup> | OTC  | Day et al. (20)         |
| 21 | <i>Sorghum</i>                  | 33.07° N | 111.97° W | 373 | 566 | 193 (51.7%) | 134 <sup>a,1</sup>   | 161   | +27 (20.1%)         | NR                   | NR    | NR                    | FACE | Derner et al. (21)      |
| 22 | <i>Cotton</i>                   | 33.07° N | 111.97° W | 373 | 566 | 193 (51.7%) | 41 <sup>a,1</sup>    | 74.5  | +33.5 (81.7%)       | NR                   | NR    | NR                    | FACE | Derner et al. (21)      |
| 23 | <i>Quercus myrtifolia</i> Wasd. | 28.63° N | 80.7° W   | 363 | 713 | 350 (96.4%) | NR                   | NR    | NR                  | 7 <sup>d,4</sup>     | 21    | +14 (200%)            | OTC  | Dilustro et al. (22)    |
| 24 | <i>Ambrosia</i>                 | 36.82° N | 115.75° W | 374 | 511 | 137 (36.6%) | NR                   | NR    | NR                  | 14.9 <sup>d,4</sup>  | 14.6  | -0.3 (-0.2%)          | FACE | Ferguson et al. (23)    |
| 25 | <i>Larrea</i>                   | 36.82° N | 115.75° W | 374 | 511 | 137 (36.6%) | NR                   | NR    | NR                  | 20.6 <sup>d,4</sup>  | 22.3  | +1.7 (8.3%)           | FACE | Ferguson et al. (23)    |
| 26 | <i>Mixed grasses</i>            | 54.17° N | 2.78° W   | 350 | 600 | 250 (71.4%) | 2970 <sup>a,1</sup>  | 4390  | +1420 (48%)         | NR                   | NR    | NR                    | OTC  | Fitter et al. (24)      |
| 27 | <i>Pinus taeda</i> L.           | 35.97° N | 79.15° W  | 334 | 534 | 200 (59.9%) | NR                   | NR    | NR                  | 363.5 <sup>c,1</sup> | 385.4 | +21.9 (6%)            | FACE | George et al. (25)      |
| 28 | <i>Sweetgum</i>                 | 35.97° N | 79.15° W  | 345 | 545 | 200 (58%)   | NR                   | NR    | NR                  | 112.6 <sup>c,1</sup> | 194.8 | +82.8 (73%)           | FACE | George et al. (25)      |
| 29 | <i>Larix decidua</i>            | 46.77° N | 9.87° E   | 370 | 576 | 206 (55.7%) | NR                   | NR    | NR                  | 240.5 <sup>c,1</sup> | 221.5 | -19 (-7.9%)           | FACE | Handa et al. (26)       |
| 30 | <i>Pinus uncinata</i>           | 46.77° N | 9.87° E   | 370 | 576 | 206 (55.7%) | NR                   | NR    | NR                  | 261.5 <sup>c,1</sup> | 463   | +201.5 (77.1%)        | FACE | Handa et al. (26)       |
| 31 | <i>Mixed grasses</i>            | 37.67° N | 122.37° W | 370 | 680 | 310 (83.8%) | NR                   | NR    | NR                  | 185 <sup>c,1</sup>   | 405   | +220 (118.9%)         | FACE | Henry et al. (27)       |
| 32 | <i>Mixed grasses</i>            | 37.4° N  | 122.22° W | 360 | 720 | 360 (100%)  | 36 <sup>a,1</sup>    | 48    | +12 (33.3%)         | NR                   | NR    | NR                    | OTC  | Higgins et al. (28)     |
| 33 | <i>Lolium perenne</i>           | 47.45° N | 8.68° E   | 350 | 600 | 250 (71.4%) | 6 <sup>a,3</sup>     | 10.5  | +4.5 (75%)          | NR                   | NR    | NR                    | FACE | Hill et al. (29)        |



|    |                                                    |          |           |     |     |             |                      |       |                     |                     |      |                       |      |                       |
|----|----------------------------------------------------|----------|-----------|-----|-----|-------------|----------------------|-------|---------------------|---------------------|------|-----------------------|------|-----------------------|
| 34 | <i>Luzula</i>                                      | 46.57° N | 8.42° E   | 385 | 580 | 195 (50.6%) | 4.2 <sup>a,2</sup>   | 4.4   | +0.2 (4.8%)         | NR                  | NR   | NR                    | FACE | Inauen et al. (30)    |
| 35 | <i>Poa</i>                                         | 46.57° N | 8.42° E   | 385 | 580 | 195 (50.6%) | 0.72 <sup>a,2</sup>  | 0.73  | +0.01 (1.4%)        | NR                  | NR   | NR                    | FACE | Inauen et al. (30)    |
| 36 | <i>Ranunculus</i>                                  | 46.57° N | 8.42° E   | 385 | 580 | 195 (50.6%) | 1.1 <sup>a,2</sup>   | 0.98  | -0.12 (-10.9%)      | NR                  | NR   | NR                    | FACE | Inauen et al. (30)    |
| 37 | <i>Veronica</i>                                    | 46.57° N | 8.42° E   | 385 | 580 | 195 (50.6%) | 0.8 <sup>a,2</sup>   | 0.82  | +0.02 (2.5%)        | NR                  | NR   | NR                    | FACE | Inauen et al. (30)    |
| 38 | <i>Sweetgum</i>                                    | 35.9° N  | 84.33° W  | 380 | 560 | 180 (50%)   | NR                   | NR    | NR                  | 209 <sup>c,1</sup>  | 437  | +228 (109%)           | FACE | Iverson et al. (31)   |
| 39 | <i>Pinus sylvestris</i><br><i>L.</i>               | 51.22° N | 4.41° E   | 350 | 750 | 400 (114%)  | 130.2 <sup>a,2</sup> | 328.5 | +198.3 (152%)       | 13.0 <sup>c,2</sup> | 29.6 | +16.6 (128%)          | OTC  | Jach et al. (32)      |
| 40 | <i>Loblolly pine</i><br><i>forest</i>              | 35.97° N | 79.083° W | 370 | 570 | 200 (54%)   | NR                   | NR    | NR                  | 248 <sup>c,1</sup>  | 307  | +59 (23.8%)           | FACE | Jackson et al. (33)   |
| 41 | <i>Pinus sylvestris</i><br><i>L.</i>               | 51.17° N | 4.4° E    | 350 | 700 | 350 (100%)  | 81.7 <sup>a,3</sup>  | 184.6 | +102.9 (126%)       | 22 <sup>c,3</sup>   | 50   | +28 (127%)            | OTC  | Janssens et al. (34)  |
| 42 | <i>Mixed grasses</i>                               | 39.2° N  | 96.58° W  | 353 | 706 | 353 (100%)  | 1038 <sup>a,1</sup>  | 1430  | +392 (37.7%)        | 327 <sup>a,1</sup>  | 489  | +162 (49.5%)          | OTC  | Jastrow et al. (35)   |
| 43 | <i>Lolium perenne</i> ,<br><i>Trifolium repens</i> | 35.97° N | 79.08° W  | 340 | 600 | 260 (76.5%) | 1020 <sup>b,5</sup>  | 1410  | +390 (38.8%)        | NR                  | NR   | NR                    | FACE | Jongen et al. (36)    |
| 44 | <i>Pinus sylvestris</i><br><i>L.</i>               | 35.97° N | 79.083° W | 360 | 720 | 360 (100%)  | NR                   | NR    | NR                  | NR                  | NR   | +39.9% <sup>c,1</sup> | OTC  | Kasurinen et al. (37) |
| 45 | <i>Citrus aurantium</i><br><i>L.</i>               | 33.42° N | 112.1° W  | 360 | 760 | 300 (83.3%) | 65 <sup>b,4</sup>    | 82.3  | +17.3 (26.6%)       | NR                  | NR   | NR                    | OTC  | Kimball et al. (38)   |
| 46 | <i>Wheat</i>                                       | 33.07° N | 111.98° W | 358 | 550 | 192 (53.6%) | NR                   | NR    | +17% <sup>a,1</sup> | NR                  | NR   | NR                    | FACE | Kimball et al. (39)   |
| 47 | <i>Trembling aspen</i>                             | 45.55° N | 84.78° W  | 360 | 560 | 200 (55.6%) | NR                   | NR    | NR                  | 72 <sup>c,1</sup>   | 124  | +52 (72.2%)           | OTC  | King et al. (40)      |
| 48 | <i>Sugar maple</i>                                 | 45.55° N | 84.78° W  | 360 | 560 | 200 (55.6%) | NR                   | NR    | NR                  | 142 <sup>c,1</sup>  | 143  | +1 (0.7%)             | OTC  | King et al. (40)      |
| 49 | <i>Aspen</i>                                       | 45.68° N | 89.63° W  | 346 | 547 | 201 (58.1%) | NR                   | NR    | NR                  | 261 <sup>c,1</sup>  | 555  | +294 (113%)           | FACE | King et al. (41)      |
| 50 | <i>Aspen--birth</i>                                | 45.68° N | 89.63° W  | 346 | 547 | 201 (58.1%) | NR                   | NR    | NR                  | 173 <sup>c,1</sup>  | 317  | +144 (83%)            | FACE | King et al. (41)      |

|    |                                 |          |           |     |     |             |                      |       |                     |                     |       |                     |      |                       |
|----|---------------------------------|----------|-----------|-----|-----|-------------|----------------------|-------|---------------------|---------------------|-------|---------------------|------|-----------------------|
| 51 | <i>Mixed grasses</i>            | 40.85° N | 104.72° W | 360 | 720 | 360 (100%)  | 920 <sup>a,1</sup>   | 1030  | +110 (12%)          | NR                  | NR    | NR                  | OTC  | King et al. (42)      |
| 52 | <i>Wheat</i>                    | 32.6° N  | 119.7° E  | 378 | 578 | 200 (52.9%) | 90.7 <sup>a,1</sup>  | 96.7  | +6 (6.6%)           | NR                  | NR    | NR                  | FACE | Kou et al. (43)       |
| 53 | <i>Acacia floribunda</i>        | 33.77° S | 151.11° E | 390 | 550 | 160 (41%)   | 89.5 <sup>a,1</sup>  | 95.6  | +6.1 (6.8%)         | 33.7 <sup>c,1</sup> | 36.0  | +2.3 (7.1%)         | GH   | Lawson et al. (44)    |
| 54 | <i>Casuarina cunninghamiana</i> | 33.77° S | 151.11° E | 390 | 550 | 160 (41%)   | 91.9 <sup>a,1</sup>  | 172.7 | +80.8 (87.9%)       | 26.3 <sup>c,1</sup> | 65.2  | +38.9 (147.5%)      | GH   | Lawson et al. (44)    |
| 55 | <i>Eucalyptus camaldulensis</i> | 33.77° S | 151.11° E | 390 | 550 | 160 (41%)   | 235.7 <sup>a,1</sup> | 227.3 | -8.4 (0.36%)        | 41.9 <sup>c,1</sup> | 27.5  | -14.4 (-34.5%)      | GH   | Lawson et al. (44)    |
| 56 | <i>P. alba</i>                  | 42.37° N | 11.8° E   | 370 | 550 | 180 (48.6%) | NR                   | NR    | +19% <sup>a,1</sup> | NR                  | NR    | NR                  | FACE | Liberloo et al. (45)  |
| 57 | <i>P. nigra</i>                 | 42.37° N | 11.8° E   | 370 | 550 | 180 (48.6%) | NR                   | NR    | +28% <sup>a,1</sup> | NR                  | NR    | NR                  | FACE | Liberloo et al. (45)  |
| 58 | <i>P. ×euramericana</i>         | 42.37° N | 11.8° E   | 370 | 550 | 180 (48.6%) | NR                   | NR    | +48% <sup>a,1</sup> | NR                  | NR    | NR                  | FACE | Liberloo et al. (45)  |
| 59 | <i>P. alba</i>                  | 42.62° N | 11.81° E  | 370 | 550 | 180 (48.6%) | NR                   | NR    | +47% <sup>a,1</sup> | NR                  | NR    | +35% <sup>c,1</sup> | FACE | Lukac et al. (46)     |
| 60 | <i>P. nigra</i>                 | 42.62° N | 11.81° E  | 370 | 550 | 180 (48.6%) | NR                   | NR    | +76% <sup>a,1</sup> | NR                  | NR    | +84% <sup>c,1</sup> | FACE | Lukac et al. (46)     |
| 61 | <i>P. ×euramericana</i>         | 42.62° N | 11.81° E  | 370 | 550 | 180 (48.6%) | NR                   | NR    | +71% <sup>a,1</sup> | NR                  | NR    | +53% <sup>c,1</sup> | FACE | Lukac et al. (46)     |
| 62 | <i>Pine tree</i>                | 35.97° N | 70.09° W  | 365 | 565 | 200 (54.8%) | NR                   | NR    | NR                  | 79.8 <sup>c,1</sup> | 134.2 | +54.4 (68.2%)       | FACE | Matamala et al. (47)  |
| 63 | <i>Mixed grass and shrub</i>    | 40.82° N | 104.77° W | 360 | 720 | 360 (100%)  | 1.31 <sup>b,4</sup>  | 1.98  | +0.67 (50.8%)       | NR                  | NR    | NR                  | OTC  | Milchunas et al. (48) |
| 64 | <i>Pinus echinata seedlings</i> | 35.93° N | 84.31° W  | 368 | 695 | 327 (88.9%) | 1.92 <sup>a,3</sup>  | 2.71  | +0.79 (41%)         | 1.00 <sup>c,3</sup> | 1.52  | +0.52 (52%)         | OTC  | Norby et al. (49)     |
| 65 | <i>Sweetgum</i>                 | 35.9° N  | 84.33° W  | 368 | 537 | 169 (45.9%) | 254 <sup>a,1</sup>   | 491   | +237 (93.3%)        | 240 <sup>c,1</sup>  | 375   | +135 (56.3%)        | FACE | Norby et al. (50)     |
| 66 | <i>Mixed grasses</i>            | 39.2° N  | 96.58° W  | 357 | 714 | 357 (100%)  | 181 <sup>a,1</sup>   | 249   | +68 (37.6%)         | NR                  | NR    | NR                  | OTC  | Owensby et al. (51)   |
| 67 | <i>Rice</i>                     | 31.62° N | 120.47° E | 375 | 575 | 200 (53.3%) | NR                   | NR    | +66% <sup>a,2</sup> | NR                  | NR    | NR                  | FACE | Pang et al. (52)      |
| 68 | <i>Mixed grasses</i>            | 40.67° N | 104.75° W | 360 | 720 | 360 (100%)  | 842 <sup>a,1</sup>   | 972   | +130 (15.4%)        | NR                  | NR    | NR                  | OTC  | Pendall et al. (53)   |

|    |                                                            |          |            |     |     |             |                      |       |               |                      |       |                       |      |                        |
|----|------------------------------------------------------------|----------|------------|-----|-----|-------------|----------------------|-------|---------------|----------------------|-------|-----------------------|------|------------------------|
| 69 | <i>Mixed grasses</i>                                       | 42.7° S  | 147.27° E  | 372 | 549 | 177 (47.6%) | 653 <sup>a,1</sup>   | 429   | -224 (-34.3%) | NR                   | NR    | NR                    | FACE | Pendall et al. (54)    |
| 70 | <i>Pinus ponderosa</i><br><i>Dougl. Ex Laws.</i>           | 35.97° N | 79.08° W   | 420 | 690 | 270 (64%)   | NR                   | NR    | NR            | 485.6 <sup>c,1</sup> | 563.5 | +77.9 (16%)           | OTC  | Phillips et al. (55)   |
| 71 | <i>Aspen</i>                                               | 45.67° N | 89.63° E   | 356 | 534 | 178 (50%)   | NR                   | NR    | NR            | 171 <sup>c,1</sup>   | 230   | +59 (34.5%)           | FACE | Pregitzer et al. (56)  |
| 72 | <i>Populus</i>                                             | 45.57° N | 84.67° W   | 345 | 693 | 348 (101%)  | 193.3 <sup>a,3</sup> | 270   | +76.7 (39.7%) | 18.3 <sup>c,3</sup>  | 27.2  | +8.9 (48.6%)          | OTC  | Pregitzer et al. (57)  |
| 73 | <i>Populus</i><br><i>termuloides</i>                       | 45.58° N | 84.7° W    | 357 | 707 | 350 (98%)   | NR                   | NR    | NR            | 79.8 <sup>c,1</sup>  | 121   | +41.2 (51.6%)         | OTC  | Pregitzer et al. (58)  |
| 74 | <i>Cotton</i>                                              | 33.07° N | 111.98° W  | 370 | 550 | 180 (48.6%) | NR                   | NR    | NR            | 1.73 <sup>d,5</sup>  | 2.11  | +0.38 (22%)           | FACE | Prior et al. (59)      |
| 75 | <i>Longleaf pine</i><br><i>savannahs</i>                   | 32.1° N  | 85.08° W   | 365 | 720 | 355 (97.3%) | 106.5 <sup>a,1</sup> | 115.6 | +9.1 (8.5%)   | NR                   | NR    | NR                    | OTC  | Pritchard et al. (60)  |
| 76 | <i>Red maple,</i><br><i>winged elm,</i><br><i>sweetgum</i> | 36.15° N | 79.97° W   | 365 | 565 | 200 (54.8%) | 181.1 <sup>a,1</sup> | 228.6 | +47.5 (26.2%) | NR                   | NR    | NR                    | FACE | Pritchard et al. (61)  |
| 77 | <i>Pinus taeda L.</i>                                      | 35.97° N | 79.08° W   | 368 | 567 | 199 (54%)   | NR                   | NR    | NR            | NR                   | NR    | +28.6% <sup>d,4</sup> | FACE | Pritchard et al. (62)  |
| 78 | <i>Winter wheat</i>                                        | 37.88° N | 114.68 ° E | 358 | 712 | 354 (98.9%) | NR                   | NR    | NR            | 1210 <sup>d,4</sup>  | 1540  | +330 (27.3%)          | OTC  | Qiao et al. (63)       |
| 79 | <i>Phaseolus</i><br><i>vulgaris</i>                        | 55.52° N | 3.2° W     | 350 | 700 | 350 (100%)  | 4.02 <sup>a,3</sup>  | 4.75  | +0.73 (18.2%) | NR                   | NR    | NR                    | OTC  | Radoglou & Jarvis (64) |
| 80 | <i>Birch tree</i>                                          | 55.52° N | 3.2° W     | 350 | 700 | 350 (100%)  | 470 <sup>a,1</sup>   | 1040  | +570 (121%)   | 200 <sup>c,1</sup>   | 480   | +280 (140%)           | OTC  | Rey & Jarvis (65)      |
| 81 | <i>Wheat</i>                                               | 55.68° N | 12.2° E    | 360 | 680 | 320 (88.9%) | 17.8 <sup>b,4</sup>  | 21.8  | +4 (22.5%)    | NR                   | NR    | NR                    | OTC  | Ronn et al. (66)       |
| 82 | <i>Pinus</i>                                               | 32.62° N | 85.48° W   | 365 | 720 | 355 (97.3)  | 1000 <sup>a,1</sup>  | 1800  | +800 (80%)    | NR                   | NR    | NR                    | OTC  | Runion et al. (67)     |
| 83 | <i>Quercus</i>                                             | 32.62° N | 85.48° W   | 365 | 720 | 355 (97.3)  | 145 <sup>a,1</sup>   | 165   | +20 (13.8%)   | NR                   | NR    | NR                    | OTC  | Runion et al. (67)     |
| 84 | <i>Aristida</i>                                            | 32.62° N | 85.48° W   | 365 | 720 | 355 (97.3)  | 190 <sup>a,1</sup>   | 130   | -60 (-31.6%)  | NR                   | NR    | NR                    | OTC  | Runion et al. (67)     |
| 85 | <i>Asclepias</i>                                           | 32.62° N | 85.48° W   | 365 | 720 | 355 (97.3)  | 6.4 <sup>a,1</sup>   | 3.2   | -3.2 (-50%)   | NR                   | NR    | NR                    | OTC  | Runion et al. (67)     |

|                       |                         |          |           |     |     |             |                      |       |               |                    |     |                      |      |                       |
|-----------------------|-------------------------|----------|-----------|-----|-----|-------------|----------------------|-------|---------------|--------------------|-----|----------------------|------|-----------------------|
| 86                    | <i>Crotalaria</i>       | 32.62° N | 85.48° W  | 365 | 720 | 355 (97.3)  | 1.9 <sup>a,1</sup>   | 1.2   | -0.7 (-36.8%) | NR                 | NR  | NR                   | OTC  | Runion et al. (67)    |
| 87                    | <i>Pigeon pea</i>       | 28.58° N | 77.2° E   | 387 | 580 | 193 (49.9%) | 450 <sup>a,1</sup>   | 600   | +150 (33.3%)  | NR                 | NR  | NR                   | OTC  | Saha et al. (68)      |
| 88                    | <i>Mixed grasses</i>    | 46.58° N | 8.38° E   | 355 | 680 | 325 (91.5%) | 80 <sup>a,1</sup>    | 84.4  | +4.4 (5.5%)   | NR                 | NR  | NR                   | OTC  | Schappi & Korner (69) |
| 89                    | <i>Lolium perenne</i>   | 47.45° N | 8.68° E   | 360 | 600 | 240 (66.7%) | 184 <sup>a,1</sup>   | 384   | +200 (109%)   | NR                 | NR  | NR                   | FACE | Suter et al. (70)     |
| 90                    | <i>Pinus radiata D.</i> | 43.53° S | 172.7° E  | 350 | 650 | 300 (85.7%) | NR                   | NR    | NR            | NR                 | NR  | +36% <sup>c,1</sup>  | OTC  | Thomas et al. (71)    |
| <i>Don</i>            |                         |          |           |     |     |             |                      |       |               |                    |     |                      |      |                       |
| 91                    | <i>Phalaris swards</i>  | 35.37° S | 149.22° E | 375 | 750 | 375 (100%)  | NR                   | NR    | NR            | 400 <sup>c,1</sup> | 465 | +65 (16.3%)          | OTC  | Volder et al. (72)    |
| 92                    | <i>Acer rubrum L.,</i>  | 35.9° N  | 84.33° W  | 364 | 664 | 300 (82.4%) | NR                   | NR    | NR            | NR                 | NR  | +122% <sup>c,1</sup> | OTC  | Wan et al. (73)       |
| <i>Acer saccharum</i> |                         |          |           |     |     |             |                      |       |               |                    |     |                      |      |                       |
| <i>Marsh.</i>         |                         |          |           |     |     |             |                      |       |               |                    |     |                      |      |                       |
| 93                    | <i>Birch tree</i>       | 55.95° N | 3.22° W   | 350 | 700 | 350 (100%)  | 315.5 <sup>a,3</sup> | 511   | +195.5 (62%)  | 110 <sup>c,3</sup> | 251 | +141 (128%)          | OTC  | Wang et al. (74)      |
| 94                    | <i>Mixed grasses</i>    | 47.45° N | 8.68° E   | 358 | 598 | 240 (67%)   | 0.48 <sup>a,2</sup>  | 0.78  | +0.3 (62.5%)  | NR                 | NR  | NR                   | FACE | Warwick et al. (75)   |
| 95                    | <i>Red spring wheat</i> | 33.12° N | 111.15° W | 370 | 550 | 180 (48.6%) | 88.8 <sup>a,1</sup>  | 104.2 | +15.4 (17.3%) | NR                 | NR  | NR                   | FACE | Wechsung et al. (76)  |
| 96                    | <i>P. tremuloides</i>   | 45.57° N | 84.67° W  | 357 | 707 | 350 (98%)   | 3110 <sup>a,2</sup>  | 4245  | +1135 (36.5%) | 555 <sup>c,2</sup> | 750 | +195 (35.1%)         | OTC  | Zak et al. (77)       |
| 97                    | <i>Cirsium arvense</i>  | 39.03° N | 76.9° W   | 419 | 762 | 343 (81.9%) | 0.335 <sup>a,2</sup> | 0.825 | +0.49 (146%)  | NR                 | NR  | NR                   | OTC  | Ziska et al. (78)     |

## 8 **References in Supporting Information**

- 9 1. Nemani, R. R. *et al.* Climate-Driven Increases in Global Terrestrial Net Primary  
10 Production from 1982 to 1999. *Science* **300**, 1560-1563 (2003).
- 11 2. Budyko, M. I. *Climate and life.* (Academic, New York, 1974).
- 12 3. Yang, Y., Randall, R. J., McVicar, T. R. & Roderick, M. L. An analytical model  
13 for relating global terrestrial carbon assimilation with climate and surface  
14 conditions using a rate limitation framework. *Geophys. Res. Lett.* **42**, 9825-9835.
- 15 4. Guswa, A. J. The influence of climate on root depth: A carbon cost-benefit  
16 analysis. *Water Resour. Res.* **44**, WR006384 (2008).
- 17 5. Ainsworth, E. A. & Rogers, A. The response of photosynthesis and stomatal  
18 conductance to rising [CO<sub>2</sub>]: mechanisms and environmental interactions. *Plant,*  
19 *Cell Environ.* **30**, 258-270 (2007).
- 20 6. Zhang, Y. *et al.* Multi-decadal trends in global terrestrial evapotranspiration and  
21 its components. *Sci. Rep.* **6**, 19124 (2006).
- 22 7. Jung, M. *et al.* Global patterns of land-atmosphere fluxes of carbon dioxide,  
23 latent heat, and sensible heat derived from eddy covariance, satellite, and  
24 meteorological observations. *J. Geophys. Res. Biogeosci.* **116**, JG001566 (2011).
- 25 8. Allen, A.S., Andrews, J.A., Finzi, A.C., Matamala, R., Richter, D.D. &  
26 Schlesinger, W.H. Effects of free-air CO<sub>2</sub> enrichment (FACE) on belowground  
27 processes in a *Pinus taeda* forest. *Ecol. Appl.* **10**, 437-448 (2000).
- 28 9. Andresen, L.C., Michelsen, A., Ambus, P. & Beier, C. Belowground heathland  
29 responses after 2 years of combined warming, elevated CO<sub>2</sub> and summer drought.  
30 *Biogeochemistry* **101**, 27-42 (2010).
- 31 10. Bader, M., Hiltbrunner, E. & Korner, C. Fine root responses of mature deciduous  
32 forest trees to free air carbon dioxide enrichment (FACE). *Funct. Ecol.* **23**, 913-  
33 921 (2009).
- 34 11. Baxter, R., Ashenden, T.W., Sparks, T.H. & Farrar, J.F. Effects of elevated  
35 carbon dioxide on three montane grass species. I. Growth and dry matter  
36 partitioning. *J. Exp. Bot.* **45**, 305-315 (1994).

- 37 12. Bazot, S., Ulf, L., Blum, H., Nguyen, C. & Robin, C. Effects of elevated CO<sub>2</sub>  
38 concentration on rhizodeposition from *Lolium perenne* grown on soil exposed to  
39 9 years of CO<sub>2</sub> enrichment. *Soil Biol. Biochem.* **38**, 729-736 (2006).
- 40 13. Bhattacharya N.C., *et al.* Interaction of enriched CO<sub>2</sub> and water stress on the  
41 physiology of and biomass production in sweet potato grown in open-top  
42 chambers. *Plant Cell Environ.* **13**, 933-940 (1990).
- 43 14. Brown, A.L.P., Day, F.P. & Stover, D.B. Fine root biomass estimates from  
44 minirhizotron imagery in a shrub ecosystem exposed to elevated CO<sub>2</sub>. *Plant and*  
45 *Soil* **317**, 145-153 (2009).
- 46 15. Calfapietra, C. *et al.* (2003) Free-air CO<sub>2</sub> enrichment (FACE) enhances biomass  
47 production in a short-rotation poplar plantation. *Tree Physiol.* **23**, 805-814  
48 (2003).
- 49 16. Carrillo, Y., Pendall, E., Dijkstra, F.A., Morgan, J.A. & Newcomb, J.M.  
50 Response of soil organic matter pools to elevated CO<sub>2</sub> and warming in a semi-  
51 arid grassland. *Plant and Soil* **347**, 339-350 (2011).
- 52 17. Centritto, M. The effects of elevated CO<sub>2</sub> and water availability on growth and  
53 physiology of peach (*Prunus persica*) plants. *Plant Biosyst.* **136**, 177-188 (2002).
- 54 18. Crookshanks, M., Taylor, G. & Broadmeadow, M. Elevated CO<sub>2</sub> and tree root  
55 growth: contrasting responses in *Fraxinus excelsior*, *Quercus petraea* and *Pinus*  
56 *sylvestris*. *New Phytol.* **138**, 241-250 (1998).
- 57 19. Crous, K.Y., Reich, P.B., Hunter, M.D. & Ellsworth, D.S. Maintenance of leaf N  
58 controls the photosynthetic CO<sub>2</sub> response of grassland species exposed to 9 years  
59 of free-air CO<sub>2</sub> enrichment. *Global Change Biol.* **16**, 2076-2088 (2010).
- 60 20. Day, F.P., Weber, E.P., Hinkle, C.R. & Drake, B.G. Effects of elevated  
61 atmospheric CO<sub>2</sub> on fine root length and distribution in an oak-palmetto scrub  
62 ecosystem in central Florida. *Global Change Biol.* **2**, 143-148 (1996).
- 63 21. Derner, J.D. *et al.* (2003) Above- and below-ground responses of C<sub>3</sub>-C<sub>4</sub> species  
64 mixtures to elevated CO<sub>2</sub> and soil water availability. *Global Change Biol.* **9**, 452-  
65 460 (2003).

- 66 22. Dilustro, J.J., Day, F.P., Drake, B.G. & Hinkle, C.R. Abundance, production and  
67 mortality of fine roots under elevated atmospheric CO<sub>2</sub> in an oak-scrub  
68 ecosystem. *Environ. Exper. Bot.* **48**, 149-159 (2002).
- 69 23. Ferguson, S.D. & Nowak, R.S. Transitory effects of elevated atmospheric CO<sub>2</sub> on  
70 fine root dynamics in an arid ecosystem do not increase long-term soil carbon  
71 input from fine root litter. *New Phytol.* **190**, 953-967 (2011).
- 72 24. Fitter, A.H. *et al.* Root production and turnover and carbon budgets of two  
73 contrasting grasslands under ambient and elevated atmospheric carbon dioxide  
74 concentrations. *New Phytol.* **137**, 247-255 (1997).
- 75 25. George, K., Norby, R.J., Hamilton, J.G. & Delucia, E.H. Fine-root respiration in a  
76 loblolly pine and sweetgum forest growing in elevated CO<sub>2</sub>. *New Phytol.* **160**,  
77 511-522 (2003).
- 78 26. Handa, I.T., Hagedorn, F. & Hattenschwiler, S. No stimulation in root production  
79 in response to 4 years of *in situ* CO<sub>2</sub> enrichment at the Swiss treeline. *Funct.*  
80 *Ecol.* **22**, 348-358 (2008).
- 81 27. Henry, H., Chiariello, N.R., Vitousek, P.M., Mooney, H.A. & Field, C.B.  
82 Interactive effects of fire, elevated carbon dioxide, nitrogen deposition, and  
83 precipitation on a California annual grassland. *Ecosystems* **9**, 1066-1075 (2006).
- 84 28. Higgins, P., Jackson, R.B., Des Rosiers, J.M. & Field, C.B. Root production and  
85 demography in a California annual grassland under elevated atmospheric carbon  
86 dioxide. *Global Change Biol.* **8**, 841-850 (2002).
- 87 29. Hill, P.W. *et al.* The fate of photosynthetically-fixed carbon in *Lolium perenne*  
88 grassland as modified by elevated CO<sub>2</sub> and sward management. *New Phytol.* **173**,  
89 766-777 (2007).
- 90 30. Inauen, N., Körner, C. & Hiltbrunner, E. No growth stimulation by CO<sub>2</sub>  
91 enrichment in alpine glacier forefield plants. *Global Change Biol.* **18**, 985-999  
92 (2012).
- 93 31. Iversen, C.M., Ledford, J., Norby, R.J. CO<sub>2</sub> enrichment increases carbon and  
94 nitrogen input from fine roots in a deciduous forest. *New Phytol.* **179**, 837-847

- 95 (2008).
- 96 32. Jach, M.E., Laureysens, I., Ceulemans, R. Above- and below-ground production  
97 of young Scots pine (*Pinus sylvestris* L.) trees after three years of growth in the  
98 field under elevated CO<sub>2</sub>. *Ann. Bot.* **85**, 789-798 (2000).
- 99 33. Jackson, R.B., Cook, C.W., Phippen, J.S. & Palmer, S.M. Increased belowground  
100 biomass and soil CO<sub>2</sub> fluxes after a decade of carbon dioxide enrichment in a  
101 warm-temperate forest. *Ecology* **90**, 3352-3366 (2009).
- 102 34. Janssens, I.A., Crookshanks, M., Taylor, G. & Ceulemans, R. Elevated  
103 atmospheric CO<sub>2</sub> increases fine root production, respiration, rhizosphere  
104 respiration and soil CO<sub>2</sub> efflux in Scots pine seedlings. *Global Change Biol.* **4**,  
105 871-878 (1998).
- 106 35. Jastrow, J.D., Miller, R.M. & Owensby, C.E. Long-term effects of elevated  
107 atmospheric CO<sub>2</sub> on below-ground biomass and transformations to soil organic  
108 matter in grassland. *Plant and Soil* **224**, 85-97 (2000).
- 109 36. Jongen, M., Jones, M.B., Hebeisen, T., Blum, H. & Hendrey, G. The effects of  
110 elevated CO<sub>2</sub> concentrations on the root growth of *Lolium perenne* and *Trifolium*  
111 *repens* grown in a FACE system. *Global Change Biol.* **1**, 361-371 (1995).
- 112 37. Kasurinen, A., Keinänen, M.M., Kaipainen, S., Nilsson, L.O., Vapaavuori, E.,  
113 Kontro, M.H. & Holopainen, T. Below-ground responses of silver birch trees  
114 exposed to elevated CO<sub>2</sub> and O<sub>3</sub> levels during three growing seasons. *Global*  
115 *Change Biol.* **11**, 1167-1179 (2005).
- 116 38. Kimball, B.A., Idso, S.B., Johnson, S. & Rillig, M.C. Seventeen years of carbon  
117 dioxide enrichment of sour orange trees: final results. *Global Change Biol.* **13**,  
118 2171-2183 (2007).
- 119 39. Kimball, B.A. *et al.* Productivity and water use of wheat under free-air CO<sub>2</sub>  
120 enrichment. *Global Change Biol.* **1**, 429-442 (1995).
- 121 40. King, J.S., Pregitzer, K.S., Zak, D.R., Holmes, W.E. & Schmidt, K. Fine root  
122 chemistry and decomposition in model communities of north-temperate tree  
123 species show little response to elevated atmospheric CO<sub>2</sub> and varying soil



- 124 resource availability. *Oecologia* **146**, 318-328 (2005).
- 125 41. King, J.S. *et al.* Fine-root biomass and fluxes of soil carbon in young stands of  
126 paper birch and trembling aspen as affected by elevated atmospheric CO<sub>2</sub> and  
127 tropospheric O<sub>3</sub>. *Oecologia* **128**, 237-250 (2001).
- 128 42. King, J.Y., Mosier, A.R., Morgan, J.A., Lecain, D.R., Milchunas, D.G. & Parton,  
129 W.J. Plant nitrogen dynamics in shortgrass steppe under elevated atmospheric  
130 carbon dioxide. *Ecosystems* **7**, 147-160 (2004).
- 131 43. Kou, T.J., Zhu, J.G., Xie, Z.B., Hasegawa, T. & Heiduk, K. Effect of elevated  
132 atmospheric CO<sub>2</sub> concentration on soil and root respiration in winter wheat by  
133 using a respiration partitioning chamber. *Plant and Soil* **299**, 237-249 (2007).
- 134 44. Lawson, J.R., Fryirs, K.A. & Leishman, M.R. Interactive effects of waterlogging  
135 and atmospheric CO<sub>2</sub> concentration on gas exchange, growth and functional traits  
136 of Australian riparian tree seedlings. *Ecohydrology* **10**, e1803 (2017).
- 137 45. Liberloo, M. *et al.* Woody biomass production during the second rotation of a  
138 bio-energy *Populus* plantation increases in a future high CO<sub>2</sub> world. *Global*  
139 *Change Biol.* **12**, 1094-1106 (2006).
- 140 46. Lukac, M., Calfapietra, C. & Godbold, D.L. Production, turnover and  
141 mycorrhizal colonization of root systems of three *Populus* species grown under  
142 elevated CO<sub>2</sub> (POPFACE). *Global Change Biol.* **9**, 838-848 (2003).
- 143 47. Matamala, R. & Schlesinger, W.H. Effects of elevated atmospheric CO<sub>2</sub> on fine  
144 root production and activity in an intact temperate forest ecosystem. *Global*  
145 *Change Biol.* **6**, 967-979 (2000).
- 146 48. Milchunas, D.G., Morgan, J.A., Mosier, A.R. & Lecain, D.R. Root dynamics and  
147 demography in shortgrass steppe under elevated CO<sub>2</sub>, and comments on  
148 minirhizotron methodology. *Global Change Biol.* **11**, 1837-1855 (2005).
- 149 49. Norby, R.J., O'Neill, E.G., Hood, W.G. & Luxmoore, R.J. Carbon allocation,  
150 root exudation and mycorrhizal colonization of *Pinus echinata* seedlings grown  
151 under CO<sub>2</sub> enrichment. *Tree Physiol.* **3**, 302-210 (1987).
- 152 50. Norby, R.J. *et al.* Net primary productivity of a CO<sub>2</sub>-enriched deciduous forest

- 153 and the implications for carbon storage. *Ecol. Appl.* **12**, 1261-1266 (2002).
- 154 51. Owensby, C.E., Ham, J.M., Knapp, A.K. & Auen, L.M. Biomass production and  
155 species composition change in a tallgrass prairie ecosystem after long-term  
156 exposure to elevated atmospheric CO<sub>2</sub>. *Global Change Biol.* **5**, 497-506 (1999).
- 157 52. Pang, J. *et al.* A new explanation of the N concentration decrease in tissues of  
158 rice (*Oryza sativa* L.) exposed to elevated atmospheric pCO<sub>2</sub>. *Environ. Exper.*  
159 *Bot.* **57**, 98-105 (2006).
- 160 53. Pendall, E., Mosier, A.R. & Morgan, J.A. Rhizodeposition stimulated by elevated  
161 CO<sub>2</sub> in a semiarid grassland. *New Phytol.* **162**, 447-458 (2004).
- 162 54. Pendall, E., Osanai, Y., Williams, A.L. & Hovenden, M.J. Soil carbon storage  
163 under simulated climate change is mediated by plant functional type. *Global*  
164 *Change Biol.* **17**, 505-514 (2011).
- 165 55. Phillips, D.L., Johnson, M.G., Tingey, D.T., Catricala, C.E., Hoyman, T.L. &  
166 Nowak, R.S. Effects of elevated CO<sub>2</sub> on fine root dynamics in a Mojave Desert  
167 community: a FACE study. *Global Change Biol.* **12**, 61-73 (2006).
- 168 56. Pregitzer, K.S., Burton, A.J., King, J.S. & Zak, D.R. Soil respiration, root  
169 biomass, and root turnover following long-term exposure of northern forests to  
170 elevated atmospheric CO<sub>2</sub> and tropospheric O<sub>3</sub>. *New Phytol.* **180**, 153-161 (2008).
- 171 57. Pregitzer, K.S., Zak, D.R., Curtis, P.S., Kubiske, M.E., Teeri, J.A. & Vogel, C.S.  
172 Atmospheric CO<sub>2</sub>, soil nitrogen and turnover of fine roots. *New Phytol.* **129**, 579-  
173 585 (1995).
- 174 58. Pregitzer, K.S., Zak, D.R., Maziasz, J., Deforest, J., Curtis, P.S. & Lussenhop, J.  
175 Interactive effects of atmospheric CO<sub>2</sub> and soil-N availability on fine roots of  
176 *Populus tremuloides*. *Ecol. Appl.* **10**, 18-33 (2000).
- 177 59. Prior, S.A., Rogers, H.H., Runion, G.B. & Mauney, J.R. Effects of free-air CO<sub>2</sub>  
178 enrichment on cotton root growth. *Agr. Forest Meteorol.* **70**, 69-86 (1994).
- 179 60. Pritchard, S.G. *et al.* Root dynamics in an artificially constructed regenerating  
180 longleaf pine ecosystem are affected by atmospheric CO<sub>2</sub> enrichment. *Environ.*  
181 *Exper. Bot.* **46**, 55-69 (2001a).

- 182 61. Pritchard, S.G. *et al.* The influence of elevated atmospheric CO<sub>2</sub> on fine root  
183 dynamics in an intact temperate forest. *Global Change Biol.* **7**, 829-837 (2001b).
- 184 62. Pritchard, S.G. *et al.* Fine root dynamics in a loblolly pine forest are influenced  
185 by free-air-CO<sub>2</sub>-enrichment: a six-year-minirhizotron study. *Global Change Biol.*  
186 **14**, 588-602 (2008).
- 187 63. Qiao, Y.Z. *et al.* Effects of elevated CO<sub>2</sub> concentration on growth and water use  
188 efficiency of winter wheat under two soil water regimes. *Agr. Water Manag.* **97**,  
189 1742-1748 (2010).
- 190 64. Radoglou, K.M. & Jarvis, P.G. The effects of CO<sub>2</sub> enrichment and nutrient  
191 supply on growth, morphology and anatomy of *Phaseolus vulgaris* seedlings.  
192 *Ann. Bot.* **70**, 245-256 (1992).
- 193 65. Rey, A. & Jarvis, P.G. Growth response of young birch trees (*Betula pendula*  
194 Roth.) after four and a half years of CO<sub>2</sub> exposure. *Ann. Bot.* **80**, 809-816 (1997).
- 195 66. Ronn, R., Ekelund, F. & Christensen, S. Effects of elevated atmospheric CO<sub>2</sub> on  
196 protozoan abundance in soil planted with wheat and on decomposition of wheat  
197 roots. *Plant and Soil* **251**, 13-21 (2003).
- 198 67. Runion, G.B. *et al.* Effects of elevated atmospheric carbon dioxide on biomass  
199 and carbon accumulation in a model regenerating longleaf pine community. *J.*  
200 *Environ. Qual.* **35**, 1478-1486 (2006).
- 201 68. Saha, S., Chakraborty, D., Lata, P. & Nagarajan, S. Impact of elevated CO<sub>2</sub> on  
202 utilization of soil moisture and associated soil biophysical parameters in pigeon  
203 pea (*Cajanus cajan* L.). *Agric. Ecosyst. Environ.* **142**, 213-221 (2011).
- 204 69. Schappi, B. & Korner, C. Growth responses of an alpine grassland to elevated  
205 CO<sub>2</sub>. *Oecologia* **105**, 43-52 (1996).
- 206 70. Suter, D., Frehner, M., Fischer, B.U., Nosberger, J. & Luscher, A. Elevated CO<sub>2</sub>  
207 increases carbon allocation to the roots of *Lolium perenne* under free-air CO<sub>2</sub>  
208 enrichment but not in a controlled environment. *New Phytol.* **154**, 65-75 (2002).
- 209 71. Thomas, S.M., Whitehead, D., Reid, J.B., Cook, F.J., Adams, J.A. & Leckie,  
210 A.C. Growth, loss, and vertical distribution of *Pinus radiata* fine roots growing at

- 211 ambient and elevated CO<sub>2</sub> concentration. *Global Change Biol.* **5**, 107-121 (1999).
- 212 72. Volder, A., Gifford, R.M. & Evans, J.R. Effects of elevated atmospheric CO<sub>2</sub>,  
213 cutting frequency, and differential day/night atmospheric warming on root growth  
214 and turnover of *Phalaris swards*. *Global Change Biol.* **13**, 1040-1052 (2007).
- 215 73. Wan, S.Q., Norby, R.J., Pregitzer, K.S., Ledford, J. & O'Neill, E.G. CO<sub>2</sub>  
216 enrichment and warming of the atmosphere enhance both productivity and  
217 mortality of maple tree fine roots. *New Phytologist* **162**, 437-446 (2004).
- 218 74. Wang, Y.P., Rey, A. & Jarvis, P.G. Carbon balance of young birch trees grown in  
219 ambient and elevated atmospheric CO<sub>2</sub> concentrations. *Global Change Biol.* **4**,  
220 797-807 (1998).
- 221 75. Warwick, K.R., Taylor, G. & Blum, H. Biomass and compositional changes  
222 occur in chalk grassland turves exposed to elevated CO<sub>2</sub> for two seasons in  
223 FACE. *Global Change Biol.* **4**, 375-385 (1998).
- 224 76. Wechsung, G. *et al.* The effects of free-air CO<sub>2</sub> enrichment and soil water  
225 availability on spatial and seasonal patterns of wheat root growth. *Global Change*  
226 *Biol.* **5**, 519-529 (1999).
- 227 77. Zak, D.R., Pregitzer, K.S., Curtis, P.S., Vogel, C.S., Holmes, W.E. & Lussenhop,  
228 J. Atmospheric CO<sub>2</sub>, soil-N availability, and allocation of biomass and nitrogen  
229 by *Populus tremuloides*. *Ecol. Appl.* **10**, 34-46 (2000).
- 230 78. Ziska, L.H., Faulkner, S. & Lydon, J. Changes in biomass and root: shoot ratio of  
231 field-grown Canada thistle (*Cirsium arvense*), a noxious, invasive weed, with  
232 elevated CO<sub>2</sub>: implications for control with glyphosate. *Weed Science* **52**, 584-  
233 588 (2004).
- 234
